# Supplementary material for: Coding and Noncoding Gene Expression Biomarkers in Mood Disorders and Schizophrenia
Source: Hindawi journal article supplement (doi:10.1155/2013/748095), 2013-01-01
Supplement: f1 [file 748095.f1.pdf]

**Supplementary Table 1.** There were 245 transcripts with statistically significant treatment response x medication x probeset interaction effects on expression after FDR step-up correction. The Affymetrix transcript ID, gene symbol, nominal p-values, FDR step-up p-value, and means for each group are shown in the table below. (Abbreviations: Med – Medication; OLZ – Olanzapine, Risp – Risperidone; TR – treatment response; Resp – Responder; Non-Resp – Non-responder).

| <b>Transcript ID</b> | <b>Gene Symbol</b> | <b>Med x TR x Probeset p-value</b> | <b>Med x TR x Probeset Step-up p-value</b> | <b>Mean (OLZ NON-RESP)</b> | <b>Mean (OLZ RESP)</b> | <b>Mean (RISP NONRESP)</b> | <b>Mean (RISP RESP)</b> |
|----------------------|--------------------|------------------------------------|--------------------------------------------|----------------------------|------------------------|----------------------------|-------------------------|
| 2932508              | TIAM2              | 5.68 X 10-20                       | 1.23 X 10-15                               | 0.23                       | 0.04                   | -0.04                      | 0.19                    |
| 3000342              | ADCY1              | 1.22 X 10-19                       | 1.32 X 10-15                               | 0.48                       | 0.45                   | 0.36                       | 0.72                    |
| 2607055              | PASK               | 7.92 X 10-13                       | 5.28 X 10-09                               | 1.16                       | 0.99                   | 0.96                       | 1.05                    |
| 3091077              | DPYSL2             | 9.78 X 10-13                       | 5.28 X 10-09                               | 1.08                       | 1.03                   | 1.00                       | 1.13                    |
| 3881651              | HCK                | 2.42 X 10-11                       | 1.04 X 10-07                               | 1.13                       | 0.82                   | 0.69                       | 1.13                    |
| 3041816              | DFNA5              | 2.38 X 10-10                       | 8.56 X 10-07                               | 1.35                       | 1.18                   | 1.04                       | 1.25                    |
| 2452069              | PIK3C2B            | 5.83 X 10-09                       | 1.80 X 10-05                               | 1.19                       | 1.05                   | 1.01                       | 1.05                    |
| 3494137              | LMO7               | 9.38 X 10-09                       | 2.53 X 10-05                               | 0.39                       | 0.39                   | 0.27                       | 0.56                    |
| 3269587              | C10orf137          | 1.53 X 10-08                       | 3.41 X 10-05                               | 0.78                       | 0.72                   | 0.74                       | 0.68                    |
| 3011492              | ADAM22             | 1.58 X 10-08                       | 3.41 X 10-05                               | 0.41                       | 0.19                   | 0.07                       | 0.24                    |
| 2785282              | SCLT1              | 2.37 X 10-08                       | 4.65 X 10-05                               | 0.65                       | 0.42                   | 0.31                       | 0.45                    |
| 2371547              | C1orf21            | 6.74 X 10-08                       | 0.0001                                     | -0.15                      | -0.20                  | -0.15                      | -0.04                   |
| 3772279              | SOCS3              | 8.66 X 10-08                       | 0.0001                                     | 0.80                       | 0.57                   | 0.60                       | 0.72                    |
| 2360083              | UBAP2L             | 1.85 X 10-07                       | 0.0003                                     | 1.23                       | 1.26                   | 1.29                       | 1.27                    |
| 3177880              | DAPK1              | 1.97 X 10-07                       | 0.0003                                     | 1.03                       | 0.81                   | 0.87                       | 0.89                    |
| 2948926              | HLA-B              | 2.09 X 10-07                       | 0.0003                                     | 1.58                       | 1.54                   | 1.52                       | 1.59                    |
| 3984945              | ARMCX3             | 2.27 X 10-07                       | 0.0003                                     | 0.69                       | 0.60                   | 0.54                       | 0.67                    |
| 2950125              | HLA-DQB2           | 2.85 X 10-07                       | 0.0003                                     | 0.47                       | 0.42                   | 0.34                       | 0.48                    |
| 2991395              | HDAC9              | 2.93 X 10-07                       | 0.0003                                     | 0.03                       | -0.05                  | -0.12                      | -0.02                   |
| 2707824              | MCCC1              | 3.16 X 10-07                       | 0.0003                                     | 1.37                       | 1.22                   | 1.08                       | 1.24                    |
| 3103607              | GDAP1              | 3.98 X 10-07                       | 0.0004                                     | 0.39                       | 0.29                   | 0.29                       | 0.35                    |
| 3666409              | CDH1               | 4.02 X 10-07                       | 0.0004                                     | 0.38                       | 0.28                   | 0.11                       | 0.58                    |
| 3459120              | LRIG3              | 6.24 X 10-07                       | 0.0006                                     | 0.23                       | -0.09                  | -0.02                      | 0.06                    |
| 2727226              | PDGFRA             | 6.58 X 10-07                       | 0.0006                                     | 0.16                       | 0.12                   | 0.11                       | 0.14                    |
| 2819044              | RASA1              | 1.04 X 10-06                       | 0.0009                                     | 0.64                       | 0.50                   | 0.44                       | 0.56                    |
| 2426559              | SLC25A24           | 1.26 X 10-06                       | 0.0010                                     | -0.05                      | -0.27                  | -0.22                      | -0.02                   |
| 2545811              | PPM1G              | 1.76 X 10-06                       | 0.0014                                     | 1.29                       | 1.21                   | 1.23                       | 1.24                    |

|         |           |              |        |       |       |       |       |
|---------|-----------|--------------|--------|-------|-------|-------|-------|
| 2474322 | C2orf28   | 1.78 X 10-06 | 0.0014 | 1.31  | 1.20  | 1.17  | 1.18  |
| 2334459 | TMEM69    | 1.97 X 10-06 | 0.0014 | 1.48  | 1.37  | 1.25  | 1.36  |
| 2892393 | BPHL      | 1.99 X 10-06 | 0.0014 | 0.08  | 0.00  | 0.03  | 0.04  |
| 2854327 | FYB       | 2.13 X 10-06 | 0.0015 | -0.50 | -0.65 | -0.67 | -0.54 |
| 2975014 | SGK1      | 2.24 X 10-06 | 0.0015 | -0.05 | -0.15 | -0.14 | 0.03  |
| 3214668 | IARS      | 3.08 X 10-06 | 0.0020 | 1.58  | 1.53  | 1.48  | 1.54  |
| 2627080 | C3orf14   | 3.18 X 10-06 | 0.0020 | -0.31 | -0.51 | -0.51 | -0.44 |
| 2488959 | STAMBP    | 3.25 X 10-06 | 0.0020 | 0.61  | 0.52  | 0.49  | 0.52  |
| 2833286 | ARHGAP26  | 4.02 X 10-06 | 0.0024 | 0.36  | 0.30  | 0.21  | 0.32  |
| 3564210 | PYGL      | 4.06 X 10-06 | 0.0024 | 0.01  | -0.22 | -0.28 | -0.15 |
| 3864646 | KCNN4     | 4.27 X 10-06 | 0.0024 | 1.04  | 1.02  | 1.02  | 1.05  |
| 2364231 | DDR2      | 4.62 X 10-06 | 0.0026 | 0.19  | 0.15  | 0.07  | 0.23  |
| 3419898 | RASSF3    | 5.34 X 10-06 | 0.0029 | 1.01  | 0.87  | 0.93  | 0.96  |
| 2479746 | C2orf34   | 5.77 X 10-06 | 0.0030 | -0.03 | -0.17 | -0.22 | -0.09 |
| 3676134 | SPSB3     | 6.54 X 10-06 | 0.0033 | 0.98  | 0.98  | 1.02  | 1.02  |
| 2383356 | CABC1     | 6.67 X 10-06 | 0.0033 | 0.67  | 0.65  | 0.66  | 0.70  |
| 2933650 | TMEM181   | 6.94 X 10-06 | 0.0034 | 0.72  | 0.58  | 0.56  | 0.58  |
| 3744680 | PIK3R5    | 7.01 X 10-06 | 0.0034 | 1.06  | 0.99  | 0.94  | 1.07  |
| 3862452 | CNTD2     | 8.73 X 10-06 | 0.0041 | 0.70  | 0.76  | 0.82  | 0.85  |
| 3602634 | ISL2      | 8.92 X 10-06 | 0.0041 | 0.64  | 0.61  | 0.67  | 0.72  |
| 3332663 | CD6       | 9.31 X 10-06 | 0.0042 | 0.17  | 0.16  | 0.24  | 0.30  |
| 2328674 | KPNA6     | 9.77 X 10-06 | 0.0043 | 1.72  | 1.68  | 1.65  | 1.68  |
| 3939365 | SMARCB1   | 1.04 X 10-05 | 0.0045 | 1.93  | 1.75  | 1.88  | 1.84  |
| 3939183 | BCR       | 1.09 X 10-05 | 0.0045 | 0.46  | 0.31  | 0.47  | 0.48  |
| 3091403 | EPHX2     | 1.09 X 10-05 | 0.0045 | 0.45  | 0.25  | 0.29  | 0.30  |
| 3831945 | ZNF793    | 1.14 X 10-05 | 0.0047 | 0.15  | 0.20  | 0.05  | 0.19  |
| 2655113 | KLHL24    | 1.25 X 10-05 | 0.0050 | 0.24  | 0.16  | 0.11  | 0.26  |
| 2766359 | RFC1      | 1.53 X 10-05 | 0.0060 | 1.09  | 1.03  | 0.99  | 1.03  |
| 2994558 | CREB5     | 1.70 X 10-05 | 0.0065 | -0.10 | -0.07 | -0.15 | 0.08  |
| 3361381 | CYB5R2    | 1.73 X 10-05 | 0.0065 | 0.76  | 0.65  | 0.65  | 0.73  |
| 2744980 | SCOC      | 1.74 X 10-05 | 0.0065 | -0.06 | -0.13 | -0.17 | -0.12 |
| 2882098 | SPARC     | 1.77 X 10-05 | 0.0065 | 1.13  | 1.05  | 0.97  | 1.14  |
| 2883440 | ADAM19    | 1.81 X 10-05 | 0.0065 | 0.67  | 0.47  | 0.57  | 0.64  |
| 2759158 | JAKMIP1   | 1.88 X 10-05 | 0.0066 | 0.43  | 0.28  | 0.36  | 0.41  |
| 2330899 | UTP11L    | 1.96 X 10-05 | 0.0068 | 0.98  | 0.81  | 0.72  | 0.79  |
| 3953086 | LOC388849 | 2.03 X 10-05 | 0.0069 | 0.58  | 0.66  | 0.63  | 0.57  |
| 2400373 | EIF4G3    | 2.06 X 10-05 | 0.0069 | 0.83  | 0.67  | 0.67  | 0.73  |
| 3598199 | ANKDD1A   | 2.11 X 10-05 | 0.0070 | 0.69  | 0.59  | 0.64  | 0.60  |
| 2512055 | TANC1     | 2.19 X 10-05 | 0.0071 | 0.23  | 0.01  | 0.18  | 0.24  |
| 2902427 | LST1      | 2.21 X 10-05 | 0.0071 | 0.69  | 0.66  | 0.61  | 0.68  |
| 3973839 | CYBB      | 2.68 X 10-05 | 0.0085 | 1.38  | 1.44  | 1.42  | 1.42  |
| 2765590 | ARAP2     | 2.78 X 10-05 | 0.0087 | 0.24  | 0.17  | 0.12  | 0.28  |
| 2583374 | PLA2R1    | 2.89 X 10-05 | 0.0089 | -0.55 | -0.53 | -0.48 | -0.51 |

|         |          |              |        |       |       |       |       |
|---------|----------|--------------|--------|-------|-------|-------|-------|
| 2823880 | CAMK4    | 3.05 X 10-05 | 0.0093 | 1.00  | 0.81  | 0.81  | 0.94  |
| 2553282 | PSME4    | 3.10 X 10-05 | 0.0093 | 1.02  | 0.84  | 0.76  | 0.91  |
| 2500919 | SLC20A1  | 3.18 X 10-05 | 0.0094 | 1.54  | 1.24  | 1.14  | 1.32  |
| 2748198 | KIAA0922 | 3.23 X 10-05 | 0.0094 | 1.44  | 1.40  | 1.36  | 1.41  |
| 2336383 | PRPF38A  | 3.35 X 10-05 | 0.0096 | 0.91  | 0.89  | 0.79  | 0.88  |
| 3400625 | ADIPOR2  | 3.65 X 10-05 | 0.0104 | 1.14  | 1.12  | 1.14  | 1.11  |
| 2438042 | SMG5     | 3.96 X 10-05 | 0.0111 | 1.49  | 1.35  | 1.34  | 1.36  |
| 2498143 | NCK2     | 4.31 X 10-05 | 0.0119 | 0.96  | 0.81  | 0.79  | 0.89  |
| 3602526 | FBXO22   | 4.83 X 10-05 | 0.0132 | 1.14  | 1.03  | 0.99  | 1.06  |
| 2573641 | CLASP1   | 4.99 X 10-05 | 0.0133 | 1.06  | 1.01  | 0.93  | 1.01  |
| 2686023 | DCBLD2   | 5.03 X 10-05 | 0.0133 | 0.10  | -0.10 | -0.07 | -0.06 |
| 2767790 | GNPDA2   | 5.06 X 10-05 | 0.0133 | 0.11  | -0.08 | -0.16 | 0.01  |
| 3064082 | LRCH4    | 5.10 X 10-05 | 0.0133 | 0.95  | 0.95  | 1.00  | 0.98  |
| 2829275 | UBE2B    | 5.25 X 10-05 | 0.0133 | 0.34  | 0.19  | 0.17  | 0.25  |
| 2939593 | PECI     | 5.25 X 10-05 | 0.0133 | 0.73  | 0.59  | 0.60  | 0.61  |
| 2508611 | ARHGAP15 | 5.39 X 10-05 | 0.0134 | 0.20  | 0.08  | 0.05  | 0.12  |
| 2609560 | THUMPD3  | 5.39 X 10-05 | 0.0134 | 1.21  | 1.05  | 0.89  | 1.09  |
| 3863576 | PAFAH1B3 | 5.48 X 10-05 | 0.0134 | 0.95  | 0.95  | 1.02  | 1.03  |
| 2863049 | C5orf37  | 5.98 X 10-05 | 0.0145 | 0.37  | 0.23  | 0.16  | 0.26  |
| 3783529 | DSG2     | 6.08 X 10-05 | 0.0146 | 0.83  | 0.56  | 0.63  | 0.71  |
| 2769947 | CLOCK    | 6.72 X 10-05 | 0.0158 | -0.01 | -0.11 | -0.16 | -0.08 |
| 2360346 | CHRNA2   | 6.72 X 10-05 | 0.0158 | 0.02  | 0.01  | 0.03  | 0.00  |
| 3468743 | NT5DC3   | 7.14 X 10-05 | 0.0165 | 0.71  | 0.56  | 0.63  | 0.66  |
| 2610336 | VHL      | 7.20 X 10-05 | 0.0165 | 0.85  | 0.72  | 0.74  | 0.79  |
| 2993727 | SNX10    | 7.44 X 10-05 | 0.0169 | 0.50  | 0.38  | 0.30  | 0.38  |
| 2669007 | DCLK3    | 7.64 X 10-05 | 0.0172 | -0.13 | -0.17 | -0.07 | -0.07 |
| 3305017 | OBFC1    | 7.89 X 10-05 | 0.0176 | 0.55  | 0.37  | 0.42  | 0.43  |
| 3251848 | SEC24C   | 8.50 X 10-05 | 0.0186 | 1.49  | 1.38  | 1.41  | 1.40  |
| 3079803 | PRKAG2   | 8.54 X 10-05 | 0.0186 | 0.03  | 0.00  | 0.04  | 0.03  |
| 2808748 | PARP8    | 8.75 X 10-05 | 0.0189 | 0.78  | 0.67  | 0.55  | 0.63  |
| 2954025 | TRERF1   | 8.94 X 10-05 | 0.0190 | 0.90  | 0.82  | 0.81  | 0.93  |
| 3114600 | TRMT12   | 8.99 X 10-05 | 0.0190 | 0.47  | 0.38  | 0.33  | 0.44  |
| 3179706 | WNK2     | 9.18 X 10-05 | 0.0192 | 0.25  | 0.30  | 0.34  | 0.29  |
| 2674673 | IP6K1    | 9.36 X 10-05 | 0.0193 | 0.66  | 0.52  | 0.55  | 0.60  |
| 2560704 | C2orf3   | 9.38 X 10-05 | 0.0193 | -0.05 | -0.22 | -0.29 | -0.11 |
| 2676518 | SFMBT1   | 9.56 X 10-05 | 0.0195 | 0.59  | 0.52  | 0.50  | 0.55  |
| 2903075 | PPT2     | 9.73 X 10-05 | 0.0196 | 0.30  | 0.33  | 0.31  | 0.34  |
| 3192033 | PPAPDC3  | 9.92 X 10-05 | 0.0198 | 0.32  | 0.37  | 0.43  | 0.40  |
| 3379708 | MRPL21   | 0.0001       | 0.0202 | 0.85  | 0.71  | 0.79  | 0.79  |
| 3839563 | KLK2     | 0.0001       | 0.0202 | 0.24  | 0.19  | 0.16  | 0.24  |
| 2912777 | FAM135A  | 0.0001       | 0.0203 | 0.25  | 0.11  | 0.04  | 0.16  |
| 3447694 | BCAT1    | 0.0001       | 0.0222 | 1.12  | 0.96  | 0.94  | 1.02  |
| 3378732 | POLD4    | 0.0001       | 0.0224 | 1.18  | 1.13  | 1.10  | 1.08  |

|         |          |        |        |       |       |       |       |
|---------|----------|--------|--------|-------|-------|-------|-------|
| 2568630 | TGFBRAP1 | 0.0001 | 0.0228 | 1.28  | 1.12  | 1.09  | 1.14  |
| 2452859 | LGTN     | 0.0001 | 0.0228 | 0.83  | 0.75  | 0.71  | 0.76  |
| 3869030 | SIGLEC10 | 0.0001 | 0.0237 | 0.46  | 0.48  | 0.51  | 0.54  |
| 2893130 | FARS2    | 0.0001 | 0.0237 | 0.31  | 0.23  | 0.19  | 0.28  |
| 3089285 | POLR3D   | 0.0001 | 0.0237 | 0.94  | 0.87  | 0.87  | 0.92  |
| 2517013 | MTX2     | 0.0001 | 0.0251 | 0.95  | 0.70  | 0.59  | 0.73  |
| 2672532 | SETD2    | 0.0001 | 0.0258 | 0.97  | 0.88  | 0.82  | 0.87  |
| 2733767 | ENOPH1   | 0.0001 | 0.0258 | 0.89  | 0.79  | 0.76  | 0.81  |
| 2328936 | ZBTB8A   | 0.0001 | 0.0258 | -0.10 | -0.34 | -0.17 | -0.14 |
| 2886679 | KCNMB1   | 0.0001 | 0.0262 | 0.32  | 0.46  | 0.27  | 0.45  |
| 2719481 | CC2D2A   | 0.0002 | 0.0263 | -0.62 | -0.62 | -0.60 | -0.62 |
| 2608725 | BHLHE40  | 0.0002 | 0.0263 | 1.40  | 1.24  | 1.24  | 1.38  |
| 3864725 | ZNF45    | 0.0002 | 0.0269 | 0.52  | 0.42  | 0.34  | 0.47  |
| 2438792 | ETV3     | 0.0002 | 0.0271 | 0.57  | 0.52  | 0.41  | 0.47  |
| 3226237 | DPM2     | 0.0002 | 0.0272 | 0.69  | 0.68  | 0.68  | 0.63  |
| 3818547 | VAV1     | 0.0002 | 0.0274 | 1.13  | 1.01  | 1.10  | 1.09  |
| 2809793 | GZMK     | 0.0002 | 0.0277 | -0.82 | -0.84 | -0.83 | -0.80 |
| 2452977 | FAIM3    | 0.0002 | 0.0284 | 1.99  | 2.03  | 2.04  | 2.08  |
| 3450234 | PKP2     | 0.0002 | 0.0288 | -0.17 | -0.03 | -0.01 | -0.14 |
| 3037535 | ZNF12    | 0.0002 | 0.0290 | 0.67  | 0.56  | 0.49  | 0.63  |
| 2651835 | GPR160   | 0.0002 | 0.0290 | 0.86  | 0.61  | 0.51  | 0.76  |
| 3820865 | CARM1    | 0.0002 | 0.0291 | 1.75  | 1.68  | 1.74  | 1.71  |
| 2515707 | PDK1     | 0.0002 | 0.0299 | 1.75  | 1.67  | 1.52  | 1.62  |
| 3664843 | CMTM3    | 0.0002 | 0.0299 | 0.81  | 0.71  | 0.80  | 0.89  |
| 3945684 | APOBEC3H | 0.0002 | 0.0305 | 0.92  | 0.79  | 0.77  | 0.79  |
| 2467691 | TTC15    | 0.0002 | 0.0305 | 0.47  | 0.46  | 0.47  | 0.46  |
| 3288224 | FRMPD2   | 0.0002 | 0.0305 | 0.03  | 0.03  | -0.01 | 0.09  |
| 3248532 | ARID5B   | 0.0002 | 0.0305 | 0.65  | 0.51  | 0.58  | 0.73  |
| 3261419 | HPS6     | 0.0002 | 0.0305 | 0.76  | 0.81  | 0.85  | 0.79  |
| 2895352 | PHACTR1  | 0.0002 | 0.0310 | 0.52  | 0.52  | 0.51  | 0.57  |
| 2768145 | COMMD8   | 0.0002 | 0.0311 | 0.22  | -0.03 | -0.09 | 0.03  |
| 3726569 | SPATA20  | 0.0002 | 0.0311 | 0.82  | 0.71  | 0.83  | 0.86  |
| 3848020 | TNFSF14  | 0.0002 | 0.0314 | 0.87  | 0.80  | 0.83  | 0.85  |
| 3724545 | ITGB3    | 0.0002 | 0.0314 | 0.73  | 0.64  | 0.29  | 0.55  |
| 2949148 | BAT3     | 0.0002 | 0.0314 | 1.97  | 1.95  | 2.00  | 1.96  |
| 3652489 | POLR3E   | 0.0002 | 0.0314 | 0.90  | 0.88  | 0.88  | 0.91  |
| 2506570 | GPR39    | 0.0002 | 0.0314 | -0.28 | -0.23 | -0.22 | -0.19 |
| 3630668 | CALML4   | 0.0002 | 0.0314 | 0.43  | 0.38  | 0.36  | 0.37  |
| 3476741 | UBC      | 0.0002 | 0.0314 | 1.05  | 1.23  | 1.51  | 1.38  |
| 2394817 | KLHL21   | 0.0002 | 0.0314 | 0.63  | 0.56  | 0.60  | 0.64  |
| 2861952 | MRPS27   | 0.0002 | 0.0314 | 0.72  | 0.64  | 0.60  | 0.70  |
| 3676356 | ZNF598   | 0.0002 | 0.0323 | 1.12  | 1.10  | 1.18  | 1.13  |
| 3226661 | ZER1     | 0.0002 | 0.0328 | 1.14  | 1.06  | 1.04  | 1.09  |

|         |          |        |        |       |       |       |       |
|---------|----------|--------|--------|-------|-------|-------|-------|
| 2957462 | GSTA4    | 0.0002 | 0.0329 | -0.41 | -0.38 | -0.36 | -0.37 |
| 3626826 | MYO1E    | 0.0003 | 0.0350 | 1.66  | 1.56  | 1.57  | 1.62  |
| 3063337 | ZNF394   | 0.0003 | 0.0350 | 1.25  | 1.13  | 1.06  | 1.16  |
| 2385146 | TRIM67   | 0.0003 | 0.0350 | 0.32  | 0.42  | 0.50  | 0.43  |
| 2378662 | TRAF5    | 0.0003 | 0.0350 | 0.65  | 0.57  | 0.50  | 0.67  |
| 2836518 | GALNT10  | 0.0003 | 0.0350 | 0.99  | 0.89  | 0.96  | 1.00  |
| 2409507 | SLC6A9   | 0.0003 | 0.0350 | 0.68  | 0.66  | 0.70  | 0.75  |
| 2914444 | IRAK1BP1 | 0.0003 | 0.0367 | -0.35 | -0.40 | -0.43 | -0.36 |
| 2430762 | WARS2    | 0.0003 | 0.0367 | 0.17  | 0.06  | 0.01  | 0.09  |
| 3590388 | NUSAP1   | 0.0003 | 0.0367 | 1.54  | 1.37  | 1.36  | 1.47  |
| 3414561 | DIP2B    | 0.0003 | 0.0371 | 1.20  | 1.09  | 1.13  | 1.19  |
| 3434888 | ORAI1    | 0.0003 | 0.0376 | 1.68  | 1.57  | 1.68  | 1.65  |
| 2316245 | PRKCZ    | 0.0003 | 0.0380 | 0.53  | 0.49  | 0.49  | 0.47  |
| 3617757 | AQR      | 0.0003 | 0.0380 | 0.83  | 0.76  | 0.80  | 0.79  |
| 3191074 | METTL11A | 0.0003 | 0.0389 | 0.85  | 0.78  | 0.83  | 0.80  |
| 3079103 | GIMAP6   | 0.0003 | 0.0389 | 1.19  | 1.01  | 0.95  | 1.28  |
| 2844479 | SQSTM1   | 0.0003 | 0.0389 | 1.37  | 1.29  | 1.28  | 1.40  |
| 3226253 | FAM102A  | 0.0003 | 0.0389 | 1.25  | 1.16  | 1.23  | 1.37  |
| 3619229 | BMF      | 0.0003 | 0.0389 | 0.98  | 1.02  | 1.07  | 1.03  |
| 3818596 | EMR1     | 0.0003 | 0.0389 | -0.01 | -0.15 | -0.12 | -0.02 |
| 3108901 | VPS13B   | 0.0003 | 0.0389 | 0.83  | 0.73  | 0.62  | 0.74  |
| 3817437 | FSD1     | 0.0003 | 0.0389 | 0.33  | 0.35  | 0.45  | 0.36  |
| 3713951 | SLC47A1  | 0.0003 | 0.0389 | 0.32  | 0.22  | 0.14  | 0.28  |
| 2316558 | RER1     | 0.0003 | 0.0389 | 0.92  | 0.86  | 0.82  | 0.87  |
| 3779817 | CEP192   | 0.0003 | 0.0389 | 0.82  | 0.70  | 0.66  | 0.69  |
| 2601230 | SCG2     | 0.0003 | 0.0389 | -0.58 | -0.55 | -0.52 | -0.54 |
| 3932131 | PSMG1    | 0.0003 | 0.0389 | 1.17  | 0.97  | 1.02  | 1.09  |
| 3698919 | GLG1     | 0.0003 | 0.0391 | 1.03  | 1.08  | 1.11  | 1.09  |
| 3776279 | EMILIN2  | 0.0003 | 0.0391 | 0.57  | 0.53  | 0.71  | 0.67  |
| 2664640 | RFTN1    | 0.0003 | 0.0392 | 1.57  | 1.52  | 1.48  | 1.53  |
| 2857204 | PPAP2A   | 0.0003 | 0.0392 | 0.08  | -0.04 | -0.04 | 0.02  |
| 2420642 | MCOLN2   | 0.0003 | 0.0392 | 1.66  | 1.56  | 1.52  | 1.62  |
| 2528620 | GMPPA    | 0.0003 | 0.0393 | 1.24  | 1.04  | 1.14  | 1.08  |
| 2515050 | GORASP2  | 0.0003 | 0.0394 | 1.01  | 0.94  | 0.92  | 0.92  |
| 2350840 | GNAI3    | 0.0003 | 0.0394 | 1.30  | 1.26  | 1.18  | 1.25  |
| 2828564 | RAD50    | 0.0004 | 0.0397 | 1.42  | 1.31  | 1.16  | 1.30  |
| 2697792 | COPB2    | 0.0004 | 0.0399 | 1.34  | 1.18  | 1.14  | 1.19  |
| 3029498 | OR2A2    | 0.0004 | 0.0401 | -0.50 | -0.38 | -0.31 | -0.44 |
| 2388525 | SDCCAG8  | 0.0004 | 0.0401 | 0.14  | 0.05  | 0.01  | 0.06  |
| 3847112 | PTPRS    | 0.0004 | 0.0419 | 0.53  | 0.52  | 0.55  | 0.65  |
| 3098977 | LYN      | 0.0004 | 0.0420 | 1.81  | 1.81  | 1.71  | 1.77  |
| 2525182 | CCNYL1   | 0.0004 | 0.0422 | 0.35  | 0.25  | 0.26  | 0.34  |
| 2827388 | PRRC1    | 0.0004 | 0.0422 | 1.58  | 1.45  | 1.35  | 1.41  |

|         |              |        |        |       |       |       |       |
|---------|--------------|--------|--------|-------|-------|-------|-------|
| 2940826 | TXNDC5       | 0.0004 | 0.0422 | 1.69  | 1.66  | 1.64  | 1.59  |
| 2775259 | RASGEF1B     | 0.0004 | 0.0422 | -0.35 | -0.38 | -0.40 | -0.34 |
| 3976609 | FTSJ1        | 0.0004 | 0.0426 | 1.40  | 1.28  | 1.34  | 1.35  |
| 3513514 | P2RY5        | 0.0004 | 0.0426 | -0.43 | -0.23 | -0.29 | -0.32 |
| 3903670 | GSS          | 0.0004 | 0.0426 | 1.09  | 0.99  | 1.07  | 1.00  |
| 2523801 | CD28         | 0.0004 | 0.0426 | 0.15  | 0.07  | -0.21 | 0.13  |
| 3075431 | KIAA1549     | 0.0004 | 0.0426 | 0.31  | 0.23  | 0.26  | 0.30  |
| 2904877 | MAPK14       | 0.0004 | 0.0426 | 0.92  | 0.84  | 0.81  | 0.78  |
| 2568968 | UXS1         | 0.0004 | 0.0426 | 0.96  | 0.84  | 0.82  | 0.83  |
| 3739162 | TBCD         | 0.0004 | 0.0428 | 1.06  | 1.14  | 1.13  | 1.09  |
| 2737717 | NFKB1        | 0.0004 | 0.0428 | 1.52  | 1.50  | 1.36  | 1.48  |
| 2903557 | RPS18        | 0.0004 | 0.0429 | 0.71  | 0.58  | 0.54  | 0.66  |
| 3031573 | GIMAP5       | 0.0004 | 0.0429 | 0.67  | 0.47  | 0.27  | 0.82  |
| 2974413 | MOXD1        | 0.0004 | 0.0429 | 0.53  | 0.26  | 0.32  | 0.59  |
| 3314040 | BNIP3        | 0.0004 | 0.0432 | 0.97  | 0.89  | 0.83  | 0.97  |
| 2888648 | RAB24        | 0.0004 | 0.0435 | 1.01  | 0.94  | 0.91  | 0.95  |
| 7385515 | MALAT1       | 0.0004 | 0.0439 | 2.21  | 2.21  | 2.24  | 2.30  |
| 2375706 | ATP2B4       | 0.0004 | 0.0442 | 0.10  | 0.03  | 0.00  | 0.06  |
| 2947975 | RP3-377H14.5 | 0.0005 | 0.0447 | 0.03  | -0.07 | -0.06 | -0.05 |
| 3315675 | IFITM1       | 0.0005 | 0.0447 | 2.49  | 2.45  | 2.41  | 2.42  |
| 3101629 | ADHFE1       | 0.0005 | 0.0451 | -0.41 | -0.34 | -0.33 | -0.38 |
| 2436576 | C1orf43      | 0.0005 | 0.0452 | 1.03  | 0.94  | 0.91  | 0.96  |
| 3985615 | TCEAL4       | 0.0005 | 0.0452 | 0.47  | 0.39  | 0.45  | 0.38  |
| 2434971 | RFX5         | 0.0005 | 0.0452 | 1.15  | 1.09  | 0.95  | 1.06  |
| 2947572 | TRIM27       | 0.0005 | 0.0455 | 1.26  | 1.14  | 1.14  | 1.14  |
| 3453533 | DDN          | 0.0005 | 0.0462 | 0.68  | 0.68  | 0.74  | 0.74  |
| 3837895 | SPHK2        | 0.0005 | 0.0471 | 0.77  | 0.72  | 0.77  | 0.77  |
| 3854349 | ABHD8        | 0.0005 | 0.0471 | 0.82  | 0.81  | 0.86  | 0.85  |
| 2695648 | ACAD11       | 0.0005 | 0.0472 | 0.36  | 0.26  | 0.11  | 0.20  |
| 2907066 | GUCA1A       | 0.0005 | 0.0472 | -0.40 | -0.33 | -0.30 | -0.37 |
| 3220384 | LPAR1        | 0.0005 | 0.0472 | -0.13 | -0.24 | -0.19 | -0.16 |
| 2768396 | TEC          | 0.0005 | 0.0472 | 0.80  | 0.78  | 0.63  | 0.87  |
| 2712794 | TCTEX1D2     | 0.0005 | 0.0478 | 0.06  | 0.03  | 0.02  | 0.04  |
| 2594951 | ALS2CR4      | 0.0005 | 0.0478 | 0.10  | 0.00  | 0.01  | 0.05  |
| 2390259 | OR2AK2       | 0.0005 | 0.0482 | -0.55 | -0.54 | -0.45 | -0.53 |
| 2745220 | ZNF330       | 0.0005 | 0.0485 | 0.80  | 0.63  | 0.48  | 0.71  |
| 2705266 | TNIK         | 0.0005 | 0.0486 | 1.14  | 0.93  | 0.89  | 0.98  |
| 3846238 | C19orf28     | 0.0005 | 0.0494 | 1.11  | 0.92  | 1.06  | 1.00  |
| 3402571 | NCAPD2       | 0.0005 | 0.0494 | 2.15  | 2.14  | 2.13  | 2.09  |
| 2877918 | LOC202051    | 0.0005 | 0.0494 | 0.16  | -0.02 | 0.07  | 0.04  |
| 2548274 | STRN         | 0.0006 | 0.0496 | 1.07  | 0.93  | 0.93  | 0.95  |
| 3168102 | CREB3        | 0.0006 | 0.0496 | 1.00  | 0.88  | 0.86  | 0.90  |
| 2841491 | C5orf41      | 0.0006 | 0.0496 | 0.58  | 0.47  | 0.29  | 0.63  |

|         |          |        |        |      |      |      |      |
|---------|----------|--------|--------|------|------|------|------|
| 3147726 | SLC25A32 | 0.0006 | 0.0496 | 0.55 | 0.48 | 0.45 | 0.52 |
| 2657665 | TP63     | 0.0006 | 0.0496 | 0.61 | 0.52 | 0.25 | 0.59 |
| 3701837 | MPHOSPH6 | 0.0006 | 0.0500 | 0.23 | 0.24 | 0.16 | 0.31 |

**Supplementary Table 2.** There were 210 transcripts with statistically significant Medication x Probeset interaction effects on expression after FDR step-up correction. The Affymetrix transcript ID, gene symbol, nominal p-values, FDR step-up p-value, means for each group and FC are shown in the table below. Fold change was calculated as  $2^{\Delta}$  (Risperidone - Olanzapine). (Abbreviations: MED – Medication; OLZ – Olanzapine, Risp – Risperidone).

| Transcript ID | Gene Symbol |              |              | Mean(OLZ) | Mean(Risp) | FC   |
|---------------|-------------|--------------|--------------|-----------|------------|------|
| 2934308       | IGF2R       | 1.39 X 10-12 | 2.99 X 10-08 | 1.18      | 1.24       | 0.95 |
| 2328273       | SERINC2     | 9.58 X 10-12 | 1.03 X 10-07 | 1.36      | 1.17       | 1.14 |
| 3011861       | STEAP2      | 4.44 X 10-11 | 3.19 X 10-07 | 0.17      | 0.00       | 1.12 |
| 2954280       | PEX6        | 1.95 X 10-09 | 1.05 X 10-05 | 0.76      | 0.76       | 1.00 |
| 3718555       | SLFN5       | 6.49 X 10-09 | 2.80 X 10-05 | 0.69      | 1.18       | 0.71 |
| 3724545       | ITGB3       | 9.46 X 10-09 | 3.40 X 10-05 | 0.69      | 0.42       | 1.20 |
| 2787459       | INPP4B      | 1.21 X 10-08 | 3.49 X 10-05 | -0.45     | -0.49      | 1.03 |
| 3959451       | MYH9        | 1.29 X 10-08 | 3.49 X 10-05 | 1.70      | 1.76       | 0.96 |
| 2395564       | SLC2A5      | 1.64 X 10-08 | 3.93 X 10-05 | 0.86      | 0.76       | 1.07 |
| 2520429       | MYO1B       | 3.85 X 10-08 | 8.30 X 10-05 | -0.20     | -0.39      | 1.14 |
| 2350489       | KIAA1324    | 9.32 X 10-08 | 0.0002       | 0.01      | -0.09      | 1.08 |
| 3629272       | PIF1        | 1.16 X 10-07 | 0.0002       | 0.75      | 0.80       | 0.96 |
| 2585400       | SCN9A       | 1.18 X 10-07 | 0.0002       | -0.65     | -0.63      | 0.99 |
| 2459793       | C1orf96     | 1.27 X 10-07 | 0.0002       | 0.68      | 0.60       | 1.06 |
| 2316245       | PRKCZ       | 1.33 X 10-07 | 0.0002       | 0.51      | 0.48       | 1.02 |
| 2949588       | DOM3Z       | 1.63 X 10-07 | 0.0002       | 0.62      | 0.58       | 1.03 |
| 3097152       | MCM4        | 2.01 X 10-07 | 0.0003       | 1.98      | 1.93       | 1.04 |
| 3374606       | MPEG1       | 2.36 X 10-07 | 0.0003       | 0.76      | 0.84       | 0.95 |
| 3400034       | WNK1        | 5.25 X 10-07 | 0.0006       | 1.21      | 1.26       | 0.96 |
| 3139580       | SLCO5A1     | 5.58 X 10-07 | 0.0006       | 1.14      | 0.95       | 1.15 |
| 3999568       | ARHGAP6     | 5.81 X 10-07 | 0.0006       | 0.36      | 0.30       | 1.04 |
| 3850020       | ANGPTL6     | 6.56 X 10-07 | 0.0006       | 1.37      | 1.37       | 1.00 |
| 3132940       | ANK1        | 9.50 X 10-07 | 0.0009       | 0.58      | 0.44       | 1.10 |
| 3442641       | CD163L1     | 1.08 X 10-06 | 0.0010       | -0.24     | -0.29      | 1.04 |
| 2919767       | AIM1        | 1.43 X 10-06 | 0.0012       | 0.97      | 0.81       | 1.12 |
| 3351975       | ABCG4       | 1.98 X 10-06 | 0.0016       | 0.21      | 0.22       | 0.99 |
| 2709132       | ETV5        | 2.04 X 10-06 | 0.0016       | 0.45      | 0.37       | 1.06 |
| 3252382       | MYST4       | 2.08 X 10-06 | 0.0016       | 0.64      | 0.59       | 1.04 |
| 3263743       | DUSP5       | 2.17 X 10-06 | 0.0016       | 2.12      | 2.06       | 1.04 |
| 3132016       | FGFR1       | 2.18 X 10-06 | 0.0016       | 0.51      | 0.37       | 1.10 |
| 2857204       | PPAP2A      | 2.37 X 10-06 | 0.0016       | 0.02      | -0.01      | 1.02 |



|         |          |              |        |       |       |      |
|---------|----------|--------------|--------|-------|-------|------|
| 2474322 | C2orf28  | 2.42 X 10-06 | 0.0016 | 1.25  | 1.18  | 1.05 |
| 2642543 | NUDT16P  | 3.06 X 10-06 | 0.0020 | 0.90  | 0.75  | 1.11 |
| 2452691 | SLC41A1  | 3.29 X 10-06 | 0.0021 | 0.63  | 0.55  | 1.06 |
| 2427500 | HBXIP    | 4.08 X 10-06 | 0.0025 | 0.72  | 0.58  | 1.10 |
| 2775965 | COQ2     | 4.18 X 10-06 | 0.0025 | 1.06  | 1.03  | 1.02 |
| 2482505 | SPTBN1   | 5.18 X 10-06 | 0.0030 | 1.31  | 1.32  | 0.99 |
| 2332528 | RIMKLA   | 6.36 X 10-06 | 0.0035 | 1.11  | 0.96  | 1.11 |
| 3030285 | CUL1     | 6.47 X 10-06 | 0.0035 | 0.91  | 0.86  | 1.03 |
| 2644702 | FAIM     | 6.66 X 10-06 | 0.0035 | 0.03  | -0.05 | 1.06 |
| 3822074 | RAD23A   | 6.77 X 10-06 | 0.0035 | 1.14  | 1.30  | 0.90 |
| 2544781 | DTNB     | 6.92 X 10-06 | 0.0035 | 0.14  | 0.14  | 1.00 |
| 2835662 | MST150   | 7.09 X 10-06 | 0.0035 | 1.00  | 0.93  | 1.05 |
| 2600155 | DNPEP    | 7.15 X 10-06 | 0.0035 | 0.82  | 0.80  | 1.02 |
| 2655555 | VWA5B2   | 7.28 X 10-06 | 0.0035 | 0.47  | 0.57  | 0.93 |
| 3871730 | ZNF787   | 7.63 X 10-06 | 0.0036 | 1.21  | 1.23  | 0.98 |
| 2333678 | B4GALT2  | 8.71 X 10-06 | 0.0040 | 1.22  | 1.20  | 1.01 |
| 3103818 | HNF4G    | 1.04 X 10-05 | 0.0047 | 0.05  | -0.03 | 1.06 |
| 2396781 | MAD2L2   | 1.13 X 10-05 | 0.0050 | 1.24  | 1.23  | 1.00 |
| 3757433 | ACLY     | 1.17 X 10-05 | 0.0050 | 1.88  | 1.88  | 1.00 |
| 2413115 | SLC1A7   | 1.23 X 10-05 | 0.0050 | 0.29  | 0.32  | 0.97 |
| 3788097 | MAPK4    | 1.23 X 10-05 | 0.0050 | 0.26  | 0.28  | 0.99 |
| 2708817 | TMEM41A  | 1.24 X 10-05 | 0.0050 | 0.69  | 0.65  | 1.03 |
| 3855324 | COPE     | 1.37 X 10-05 | 0.0055 | 1.16  | 1.11  | 1.03 |
| 2437307 | SCAMP3   | 1.46 X 10-05 | 0.0057 | 0.93  | 0.84  | 1.07 |
| 3005363 | ASL      | 1.67 X 10-05 | 0.0064 | 0.81  | 0.80  | 1.01 |
| 2711751 | TMEM44   | 1.75 X 10-05 | 0.0066 | 0.32  | 0.33  | 0.99 |
| 3817984 | SAFB     | 1.89 X 10-05 | 0.0070 | 0.84  | 1.01  | 0.88 |
| 2333481 | ST3GAL3  | 1.95 X 10-05 | 0.0071 | 0.52  | 0.50  | 1.02 |
| 3339812 | ARHGEF17 | 1.97 X 10-05 | 0.0071 | 0.57  | 0.47  | 1.07 |
| 3333169 | C11orf9  | 2.05 X 10-05 | 0.0073 | 0.57  | 0.50  | 1.05 |
| 2882098 | SPARC    | 2.09 X 10-05 | 0.0073 | 1.09  | 1.05  | 1.03 |
| 2915828 | NT5E     | 2.29 X 10-05 | 0.0078 | 0.09  | -0.10 | 1.13 |
| 3040518 | MACC1    | 2.35 X 10-05 | 0.0079 | 0.44  | 0.27  | 1.12 |
| 3079722 | CRYGN    | 2.65 X 10-05 | 0.0087 | 0.07  | 0.10  | 0.98 |
| 3235255 | ECHDC3   | 2.66 X 10-05 | 0.0087 | 0.55  | 0.46  | 1.06 |
| 2330133 | EIF2C3   | 2.84 X 10-05 | 0.0091 | 0.41  | 0.35  | 1.04 |
| 2795819 | DCTD     | 2.93 X 10-05 | 0.0092 | 1.01  | 0.96  | 1.04 |
| 2649824 | SCHIP1   | 2.94 X 10-05 | 0.0092 | -0.01 | -0.03 | 1.02 |
| 3230594 | CLIC3    | 3.01 X 10-05 | 0.0093 | 0.77  | 0.84  | 0.96 |
| 3847252 | SAFB2    | 3.09 X 10-05 | 0.0094 | 0.71  | 0.87  | 0.90 |
| 3512769 | ZC3H13   | 3.14 X 10-05 | 0.0094 | 0.17  | 0.36  | 0.88 |
| 2436283 | DENND4B  | 3.20 X 10-05 | 0.0095 | 1.18  | 1.16  | 1.01 |
| 3402757 | LAG3     | 3.28 X 10-05 | 0.0096 | 0.73  | 0.67  | 1.05 |

|         |           |              |        |       |       |      |
|---------|-----------|--------------|--------|-------|-------|------|
| 3074039 | SLC35B4   | 3.50 X 10-05 | 0.0100 | 0.75  | 0.66  | 1.06 |
| 2440018 | WDR42A    | 3.51 X 10-05 | 0.0100 | 0.90  | 0.84  | 1.05 |
| 3510755 | LOC646982 | 3.69 X 10-05 | 0.0102 | -0.38 | -0.37 | 0.99 |
| 2656971 | RTP1      | 3.70 X 10-05 | 0.0102 | 0.02  | 0.03  | 0.99 |
| 3628104 | FAM148B   | 3.77 X 10-05 | 0.0103 | -0.36 | -0.39 | 1.02 |
| 2402395 | LOC646471 | 3.81 X 10-05 | 0.0103 | 0.05  | -0.01 | 1.05 |
| 2813364 | SLC30A5   | 3.92 X 10-05 | 0.0105 | 0.99  | 0.87  | 1.09 |
| 2391302 | ACAP3     | 4.04 X 10-05 | 0.0106 | 0.84  | 0.87  | 0.98 |
| 2933650 | TMEM181   | 4.18 X 10-05 | 0.0109 | 0.65  | 0.57  | 1.06 |
| 3909035 | SPATA2    | 4.42 X 10-05 | 0.0113 | 0.94  | 1.02  | 0.95 |
| 3688424 | C16orf58  | 4.64 X 10-05 | 0.0118 | 1.12  | 1.06  | 1.04 |
| 2828520 | SLC22A5   | 4.77 X 10-05 | 0.0120 | 0.05  | 0.04  | 1.01 |
| 2527672 | PNKD      | 4.83 X 10-05 | 0.0120 | 0.47  | 0.43  | 1.02 |
| 3627422 | RORA      | 4.89 X 10-05 | 0.0120 | 0.34  | 0.27  | 1.05 |
| 2654394 | FXR1      | 5.10 X 10-05 | 0.0124 | 0.32  | 0.43  | 0.93 |
| 2700828 | SIAH2     | 5.41 X 10-05 | 0.0130 | 1.45  | 1.43  | 1.02 |
| 2903782 | ITPR3     | 5.60 X 10-05 | 0.0133 | 1.09  | 1.09  | 1.00 |
| 3884612 | SNHG11    | 5.72 X 10-05 | 0.0134 | 0.61  | 0.58  | 1.02 |
| 2886679 | KCNMB1    | 6.00 X 10-05 | 0.0139 | 0.39  | 0.36  | 1.02 |
| 2724094 | FAM114A1  | 6.50 X 10-05 | 0.0149 | -0.06 | -0.13 | 1.05 |
| 3560403 | EGLN3     | 6.56 X 10-05 | 0.0149 | 0.56  | 0.45  | 1.07 |
| 2529421 | SGPP2     | 7.19 X 10-05 | 0.0162 | 1.87  | 1.75  | 1.09 |
| 3676356 | ZNF598    | 7.43 X 10-05 | 0.0165 | 1.11  | 1.16  | 0.97 |
| 3868905 | ATPBD3    | 7.88 X 10-05 | 0.0173 | 0.98  | 1.05  | 0.96 |
| 3476741 | UBC       | 8.25 X 10-05 | 0.0180 | 1.14  | 1.44  | 0.81 |
| 3883441 | SPAG4     | 8.59 X 10-05 | 0.0185 | 0.65  | 0.62  | 1.02 |
| 4001654 | GPR64     | 8.66 X 10-05 | 0.0185 | -0.33 | -0.51 | 1.13 |
| 2403027 | MAP3K6    | 9.02 X 10-05 | 0.0191 | 0.40  | 0.46  | 0.96 |
| 2417095 | SLC35D1   | 9.10 X 10-05 | 0.0191 | 0.91  | 0.74  | 1.13 |
| 2960010 | LMBRD1    | 9.60 X 10-05 | 0.0199 | 0.51  | 0.42  | 1.06 |
| 2550122 | COX7A2L   | 9.96 X 10-05 | 0.0204 | 0.54  | 0.51  | 1.02 |
| 3056226 | STX1A     | 0.0001       | 0.0204 | 0.38  | 0.43  | 0.97 |
| 3168700 | ZCCHC7    | 0.000103     | 0.0206 | 0.07  | 0.03  | 1.02 |
| 2383999 | OBSCN     | 0.000103     | 0.0206 | 0.27  | 0.33  | 0.96 |
| 2828479 | SLC22A4   | 0.000105     | 0.0208 | -0.30 | -0.25 | 0.96 |
| 3737697 | BAIAP2    | 0.000112     | 0.0220 | 0.25  | 0.28  | 0.98 |
| 2776088 | FAM175A   | 0.000121     | 0.0235 | -0.38 | -0.39 | 1.01 |
| 3684039 | CRYM      | 0.000124     | 0.0238 | 0.16  | 0.07  | 1.07 |
| 2324097 | PINK1     | 0.000128     | 0.0242 | 0.48  | 0.47  | 1.01 |
| 2928690 | AIG1      | 0.000128     | 0.0242 | 0.07  | 0.02  | 1.04 |
| 2676182 | NT5DC2    | 0.000129     | 0.0242 | 1.10  | 1.06  | 1.03 |
| 3283991 | KIF5B     | 0.000137     | 0.0253 | 0.49  | 0.65  | 0.90 |
| 3759587 | PLCD3     | 0.000137     | 0.0253 | 0.57  | 0.60  | 0.98 |

|         |           |          |        |       |       |      |
|---------|-----------|----------|--------|-------|-------|------|
| 2754371 | CCDC111   | 0.00014  | 0.0256 | -0.08 | -0.26 | 1.13 |
| 2879105 | SPRY4     | 0.000143 | 0.0260 | 0.48  | 0.42  | 1.04 |
| 2326448 | SH3BGL3   | 0.000146 | 0.0261 | 1.40  | 1.37  | 1.02 |
| 2793221 | NEK1      | 0.000147 | 0.0261 | -0.10 | -0.18 | 1.06 |
| 3527965 |           | 0.000149 | 0.0261 | -0.26 | -0.10 | 0.89 |
| 3608113 | IQGAP1    | 0.00015  | 0.0261 | 1.14  | 1.25  | 0.93 |
| 2667181 | AZI2      | 0.00015  | 0.0261 | -0.04 | -0.13 | 1.06 |
| 2890517 | RASGEF1C  | 0.000156 | 0.0267 | 0.38  | 0.48  | 0.94 |
| 3963921 | LOC642648 | 0.000156 | 0.0267 | 0.13  | 0.06  | 1.05 |
| 3089597 | KIAA1967  | 0.000158 | 0.0268 | 1.23  | 1.21  | 1.01 |
| 2667024 | EOMES     | 0.000159 | 0.0268 | 0.23  | 0.37  | 0.91 |
| 3064006 | C7orf47   | 0.00016  | 0.0268 | 1.47  | 1.49  | 0.99 |
| 3872969 | ZBTB45    | 0.000161 | 0.0268 | 0.80  | 0.85  | 0.97 |
| 2323603 | PQLC2     | 0.000164 | 0.0270 | 0.76  | 0.80  | 0.97 |
| 3282974 | SVIL      | 0.000168 | 0.0274 | -0.12 | -0.15 | 1.02 |
| 2320581 | PLOD1     | 0.000169 | 0.0274 | 1.45  | 1.38  | 1.05 |
| 2432607 | GNRHR2    | 0.000171 | 0.0275 | 0.30  | 0.34  | 0.97 |
| 3848525 | CLEC4G    | 0.000173 | 0.0277 | 0.81  | 0.79  | 1.02 |
| 2643095 | BFSP2     | 0.00018  | 0.0285 | 0.19  | 0.19  | 1.00 |
| 2831284 | UBE2D2    | 0.000182 | 0.0287 | 1.49  | 1.35  | 1.11 |
| 2365496 | POGK      | 0.000187 | 0.0288 | 1.26  | 1.18  | 1.06 |
| 2954771 | GTPBP2    | 0.000188 | 0.0288 | 0.94  | 0.89  | 1.04 |
| 2360158 | HAX1      | 0.000188 | 0.0288 | 0.43  | 0.41  | 1.01 |
| 3122721 | DEFA4     | 0.000189 | 0.0288 | -0.29 | -0.23 | 0.96 |
| 2827057 | GRAMD3    | 0.000191 | 0.0288 | 0.25  | 0.16  | 1.06 |
| 2545144 | GPR113    | 0.000191 | 0.0288 | 0.06  | 0.08  | 0.99 |
| 2650066 | IL12A     | 0.000194 | 0.0290 | 0.17  | 0.07  | 1.07 |
| 3830320 | MAG       | 0.000198 | 0.0292 | 0.05  | 0.10  | 0.96 |
| 3850929 | CCDC151   | 0.000199 | 0.0292 | 0.15  | 0.17  | 0.98 |
| 3733590 | SOX9      | 0.000199 | 0.0292 | 1.39  | 1.32  | 1.06 |
| 2610241 | FANCD2    | 0.000206 | 0.0300 | 0.67  | 0.65  | 1.01 |
| 2556185 | UGP2      | 0.000212 | 0.0307 | 0.46  | 0.43  | 1.02 |
| 2991860 | ITGB8     | 0.000223 | 0.0321 | 0.12  | -0.07 | 1.15 |
| 2949524 | EHMT2     | 0.000225 | 0.0321 | 1.33  | 1.31  | 1.02 |
| 2356142 | LIX1L     | 0.000228 | 0.0324 | 1.53  | 1.50  | 1.02 |
| 2566383 | C2orf64   | 0.00023  | 0.0324 | 0.58  | 0.51  | 1.05 |
| 3972427 | HMGA1     | 0.000233 | 0.0327 | 1.07  | 0.95  | 1.09 |
| 2550175 | KCNG3     | 0.000241 | 0.0333 | -0.05 | -0.02 | 0.98 |
| 3816424 | SPPL2B    | 0.000242 | 0.0333 | 0.95  | 0.94  | 1.00 |
| 2545869 | IFT172    | 0.000242 | 0.0333 | 0.22  | 0.17  | 1.04 |
| 2661992 | OXTR      | 0.000247 | 0.0338 | 0.56  | 0.44  | 1.09 |
| 3168032 | C9orf100  | 0.000253 | 0.0343 | 1.15  | 1.16  | 0.99 |
| 3328349 | ACCS      | 0.000254 | 0.0343 | 0.30  | 0.23  | 1.05 |

|         |          |          |        |       |       |      |
|---------|----------|----------|--------|-------|-------|------|
| 3056131 | TBL2     | 0.000259 | 0.0346 | 0.94  | 0.89  | 1.04 |
| 2474527 | NRBP1    | 0.000259 | 0.0346 | 1.59  | 1.59  | 1.00 |
| 3944826 | SH3BP1   | 0.000268 | 0.0354 | 0.91  | 0.98  | 0.95 |
| 3204496 | PIGO     | 0.000269 | 0.0354 | 0.69  | 0.67  | 1.01 |
| 3268333 | HTRA1    | 0.000278 | 0.0364 | 1.00  | 1.07  | 0.95 |
| 3755323 | PCGF2    | 0.00028  | 0.0364 | 1.01  | 0.95  | 1.04 |
| 2575196 | SAP130   | 0.000285 | 0.0367 | 1.18  | 1.14  | 1.03 |
| 2438207 | MEF2D    | 0.000287 | 0.0367 | 1.75  | 1.72  | 1.02 |
| 2616166 | CRTAP    | 0.000288 | 0.0367 | 0.98  | 0.94  | 1.03 |
| 3762443 | C17orf73 | 0.0003   | 0.0381 | -0.17 | -0.15 | 0.99 |
| 2817576 | THBS4    | 0.000305 | 0.0385 | 0.00  | 0.01  | 1.00 |
| 2842911 | FGFR4    | 0.000317 | 0.0397 | 0.54  | 0.54  | 1.00 |
| 3360505 | OR51B2   | 0.000318 | 0.0397 | -0.55 | -0.47 | 0.94 |
| 3378732 | POLD4    | 0.000324 | 0.0402 | 1.16  | 1.09  | 1.05 |
| 3941848 | EMID1    | 0.000331 | 0.0408 | 0.74  | 0.67  | 1.05 |
| 3708644 | FGF11    | 0.000337 | 0.0413 | 0.79  | 0.73  | 1.04 |
| 2949622 | TNXB     | 0.000351 | 0.0427 | 0.65  | 0.69  | 0.97 |
| 2376799 | IKBKE    | 0.000352 | 0.0427 | 0.88  | 0.86  | 1.01 |
| 2553282 | PSME4    | 0.000355 | 0.0428 | 0.93  | 0.84  | 1.07 |
| 2592268 | STAT1    | 0.000363 | 0.0431 | 2.03  | 1.95  | 1.05 |
| 3761054 | COPZ2    | 0.000364 | 0.0431 | 0.44  | 0.47  | 0.98 |
| 3194470 | EGFL7    | 0.000365 | 0.0431 | 0.69  | 0.74  | 0.97 |
| 2452187 | LRRN2    | 0.000366 | 0.0431 | 0.39  | 0.40  | 0.99 |
| 2996321 | BBS9     | 0.000373 | 0.0432 | -0.13 | -0.18 | 1.04 |
| 3279540 | C1QL3    | 0.000377 | 0.0432 | 0.78  | 0.80  | 0.99 |
| 3085270 | TNKS     | 0.000378 | 0.0432 | 0.51  | 0.42  | 1.06 |
| 2437273 | C1orf2   | 0.000379 | 0.0432 | 1.12  | 1.13  | 0.99 |
| 2350922 | GSTM4    | 0.00038  | 0.0432 | 1.02  | 0.85  | 1.13 |
| 3063463 | CYP3A7   | 0.00038  | 0.0432 | -0.82 | -0.86 | 1.03 |
| 3723378 | FMNL1    | 0.000382 | 0.0432 | 1.02  | 1.09  | 0.95 |
| 3704376 | FAM38A   | 0.000383 | 0.0432 | 1.18  | 1.20  | 0.98 |
| 3000953 | UPP1     | 0.000388 | 0.0436 | 0.35  | 0.32  | 1.02 |
| 3597914 | SNX22    | 0.000391 | 0.0437 | 0.77  | 0.76  | 1.01 |
| 2714465 | FGFRL1   | 0.0004   | 0.0445 | 0.67  | 0.73  | 0.96 |
| 3845229 | PCSK4    | 0.000402 | 0.0445 | 0.49  | 0.52  | 0.98 |
| 2950668 | DAXX     | 0.000405 | 0.0446 | 0.56  | 0.64  | 0.94 |
| 2330393 | C1orf113 | 0.000407 | 0.0446 | 0.77  | 0.79  | 0.99 |
| 3015147 | ZKSCAN1  | 0.00041  | 0.0447 | 0.97  | 0.88  | 1.06 |
| 3645626 | IL32     | 0.000416 | 0.0449 | 1.60  | 1.55  | 1.04 |
| 2438504 | MRPL24   | 0.000416 | 0.0449 | 1.12  | 1.08  | 1.02 |
| 3668834 | ZNRF1    | 0.000425 | 0.0456 | 0.76  | 0.75  | 1.00 |
| 3434490 | CABP1    | 0.000428 | 0.0457 | 0.51  | 0.43  | 1.06 |
| 3101153 | BHLHE22  | 0.000432 | 0.0459 | 1.20  | 1.05  | 1.11 |

|         |         |          |        |       |       |      |
|---------|---------|----------|--------|-------|-------|------|
| 2754673 | ANKRD37 | 0.000434 | 0.0459 | 0.68  | 0.60  | 1.06 |
| 2708429 | CAMK2N2 | 0.000454 | 0.0477 | 0.77  | 0.93  | 0.90 |
| 2545509 | PREB    | 0.000459 | 0.0481 | 1.22  | 1.21  | 1.01 |
| 3571347 | NUMB    | 0.000469 | 0.0489 | 0.81  | 0.75  | 1.04 |
| 3368304 | WT1     | 0.000481 | 0.0499 | 0.50  | 0.53  | 0.98 |
| 2675925 | DUSP7   | 0.000484 | 0.0499 | 1.26  | 1.21  | 1.04 |
| 2420832 | DDAH1   | 0.000486 | 0.0499 | -0.10 | -0.06 | 0.97 |

**Supplementary Table 3.** Input variables for Ingenuity Pathway Analysis of the 200 genes most significantly associated with treatment response x probeset effects on expression.

|           |          |              |          |
|-----------|----------|--------------|----------|
| ADAM23    | CST3     | KIAA0284     | PXN      |
| ADAM6     | CXCL10   | KIF24        | RBCK1    |
| ADAP1     | CYLC2    | KIT          | RECQL4   |
| AFF3      | DBF4B    | KRT82        | RIN3     |
| AGRN      | DDX54    | KRT83        | RNF126P1 |
| ANKRD13D  | DENND1A  | LAD1         | RNF26    |
| ANO7      | DENND2D  | LGALS14      | RNF31    |
| AP1B1     | DUOX1    | LINGO1       | RNPEPL1  |
| ARHGAP8   | DUS1L    | LMO7         | ROBO1    |
| ARHGEF11  | DZIP1    | LOC100129697 | RPL35    |
| ARID3A    | EDNRB    | LOC26010     | SAP130   |
| ASNA1     | EIF1     | LOC441233    | SCARF1   |
| ATP13A1   | EMD      | LOC645249    | SEMA4B   |
| ATP6VOE2  | ERAL1    | LPIN1        | SESN3    |
| BMP6      | FAM120A  | LRP5         | SGK3     |
| BPESC1    | FAM173A  | LRRC15       | SHROOM3  |
| BPNT1     | FAM86A   | LRRC61       | SLC22A25 |
| BRF1      | FBL      | LRWD1        | SLC26A4  |
| BSPRY     | FEZ1     | LYPLA2       | SLC26A9  |
| BTG2      | FLII     | MARVELD1     | SLC2A5   |
| C11orf24  | FLJ32065 | MATN1        | SLC5A2   |
| C16orf48  | FLJ39582 | MICAL2       | SLC6A2   |
| C16orf67  | FLJ45513 | MMP10        | SLC7A6OS |
| C1orf54   | FNBP1L   | MRGPRF       | SORCS3   |
| C21orf129 | FOLH1    | MRPL49       | SPO11    |
| C21orf56  | FOXL1    | MSH5         | SQRDL    |
| C22orf37  | FOXP3    | NDRG4        | SRF      |
| C2orf24   | FOXR2    | NDUFA13      | SRRT     |
| C2orf39   | FYN      | NEB          | SUSD5    |
| C5orf35   | GAP43    | NETO1        | TAF6     |
| C6orf227  | GAR1     | NEUROD2      | TBX21    |
| C7orf20   | GAS2     | NLRP11       | TCL6     |
| CC2D1A    | GCLM     | NMUR2        | TECPR1   |
| CCND3     | GINS2    | NOTCH1       | TMEM125  |
| CCRL1     | GJB5     | NT5DC2       | TMEM156  |
| CCT5      | GLIS3    | PHC1         | TMEM51   |
| CD276     | GPR124   | PHLDA2       | TP73     |
| CDH29     | GPX7     | PKN1         | TUFM     |

|        |         |         |        |
|--------|---------|---------|--------|
| CDX4   | HEJ1    | PLCD1   | UBE2F  |
| CHRDL1 | HEPHL1  | PLCH2   | UBE2L6 |
| CLSTN2 | HTRA4   | PLEKHB2 | UCK2   |
| CLTB   | IDH2    | PMS2L3  | USP31  |
| CPPED1 | IL18    | PPM1E   | UST    |
| CPS1   | IL22    | PRDM9   | VEGFB  |
| CPSF4L | IRF2BP1 | PRELID2 | VGFB   |
| CREB5  | ISG20L2 | PRKCD   | WDR44  |
| CRELD2 | KANK2   | PRPF6   | WNT6   |
| CRHR2  | KCNE4   | PRSS16  | ZBTB8A |
| CSF1   | KCNMB1  | PTK2    | ZNF514 |
| CSN1S1 | KCTD14  | PUM1    | ZNFX1  |

**Supplementary Table 4.** Input variables for Ingenuity Pathway Analysis of the 200 genes most significantly associated with treatment response x medication x probeset effects on expression.

|           |          |          |          |
|-----------|----------|----------|----------|
| ADAM19    | DPM2     | LRCH4    | SCLT1    |
| ADAM22    | DPYSL2   | LRIG3    | SCOC     |
| ADCY1     | DSG2     | LST1     | SDCCAG8  |
| ADIPOR2   | EIF4G3   | LYN      | SEC24C   |
| ANKDD1A   | EMILIN2  | MCCC1    | SETD2    |
| APOBEC3H  | EMR1     | MCOLN2   | SFMBT1   |
| AQR       | ENOPH1   | METTL11A | SGK1     |
| ARAP2     | EPHX2    | MRPL21   | SIGLEC10 |
| ARHGAP15  | ETV3     | MRPS27   | SLC20A1  |
| ARHGAP26  | FAIM3    | MTX2     | SLC25A24 |
| ARID5B    | FAM102A  | MYO1E    | SLC47A1  |
| ARMCX3    | FAM135A  | NCK2     | SLC6A9   |
| BAT3      | FARS2    | NT5DC3   | SMARCB1  |
| BCAT1     | FBXO22   | NUSAP1   | SMG5     |
| BCR       | FRMPD2   | OBFC1    | SNX10    |
| BHLHE40   | FSD1     | OR2A2    | SOCS3    |
| BMF       | FYB      | ORAI1    | SPARC    |
| BPHL      | GALNT10  | PAFAH1B3 | SPATA20  |
| C10orf137 | GDAP1    | PARP8    | SPSB3    |
| C1orf21   | GIMAP6   | PASK     | SQSTM1   |
| C2orf28   | GLG1     | PDGFRA   | STAMBP   |
| C2orf3    | GMPPA    | PDK1     | TANC1    |
| C2orf34   | GNAI3    | PECI     | TGFBRAP1 |
| C3orf14   | GNPDA2   | PHACTR1  | THUMPD3  |
| C5orf37   | GORASP2  | PIK3C2B  | TIAM2    |
| CABC1     | GPR160   | PIK3R5   | TMEM181  |
| CALML4    | GPR39    | PKP2     | TMEM69   |
| CAMK4     | GSTA4    | PLA2R1   | TNFSF14  |
| CARM1     | GZMK     | POLD4    | TRAF5    |
| CC2D2A    | HCK      | POLR3D   | TRERF1   |
| CCNYL1    | HDAC9    | POLR3E   | TRIM67   |
| CD6       | HLA-B    | PPAP2A   | TRMT12   |
| CDH1      | HLA-DQB2 | PPAPDC3  | TTC15    |
| CEP192    | HPS6     | PPM1G    | TXNDC5   |
| CHRN2     | IARS     | PPT2     | UBAP2L   |
| CLASP1    | IP6K1    | PRKAG2   | UBC      |



|        |           |         |        |
|--------|-----------|---------|--------|
| CLOCK  | IRAK1BP1  | PRKCZ   | UBE2B  |
| CMTM3  | ISL2      | PRPF38A | UTP11L |
| CNTD2  | ITGB3     | PRRC1   | VAV1   |
| COMMD8 | JAKMIP1   | PSME4   | VHL    |
| COPB2  | KCNMB1    | PSMG1   | VPS13B |
| CREB5  | KCNN4     | PTPRS   | WARS2  |
| CYB5R2 | KIAA0922  | PYGL    | WNK2   |
| CYBB   | KLHL21    | RAD50   | ZBTB8A |
| DAPK1  | KLHL24    | RASA1   | ZER1   |
| DCBLD2 | KLK2      | RASSF3  | ZNF12  |
| DCLK3  | KPNA6     | RER1    | ZNF394 |
| DDR2   | LGTN      | RFC1    | ZNF45  |
| DFNA5  | LMO7      | RFTN1   | ZNF598 |
| DIP2B  | LOC388849 | SCG2    | ZNF793 |
